# Supplementary material for: Working Together: Contributions of Corpus Analyses and Experimental Psycholinguistics to Understanding Conversation
Source: PubMed Central journal article supplement (PMC5906713; doi:10.3389/fpsyg.2018.00525), 2018-04-12
Supplement: Data_Sheet_1.pdf [file Data_Sheet_1.pdf]

**Appendix A: Names of objects used in Experiments 1 and 2**

set 1: bijl (axe), bloem (flower), boog (bow), bril (glasses)

set 2: klok (clock), knoop (button), koets (coach), kok (chef)

set 3: plank (board), pijp (pipe), pet (cap), pan (sauce pan)

set 4: taart (cake), tak (branch), ton (barrel), trui (jumper)

**Appendix B: Output model Experiment 1**

| <i>Output model Experiment 1 (Linear mixed model fit by maximum likelihood)</i>                                                    |                          |                 |                   |                 |
|------------------------------------------------------------------------------------------------------------------------------------|--------------------------|-----------------|-------------------|-----------------|
| Formula                                                                                                                            |                          |                 |                   |                 |
| RT ~ 1 + DisplayType * ResponseType + (1 + ResponseType + DisplayType   Participant) + (1 + ResponseType + DisplayType   Question) |                          |                 |                   |                 |
| Control (lmerControl(optimizer = "bobyqa"))                                                                                        |                          |                 |                   |                 |
| <u>AIC</u>                                                                                                                         | <u>BIC</u>               | <u>logLik</u>   | <u>deviance</u>   | <u>df.resid</u> |
| 31715                                                                                                                              | 31814                    | -15840          | 31681             | 2431            |
| Scaled Residuals                                                                                                                   |                          |                 |                   |                 |
| <u>Min</u>                                                                                                                         | <u>1Q</u>                | <u>Median</u>   | <u>3Q</u>         | <u>Max</u>      |
| -4.19                                                                                                                              | -0.56                    | -0.08           | 0.44              | 5.92            |
| Random Effects                                                                                                                     |                          |                 |                   |                 |
| <u>Groups</u>                                                                                                                      | <u>Name</u>              | <u>Variance</u> | <u>Std.Dev</u>    | <u>Corr</u>     |
| Question                                                                                                                           | Intercept                | 1573            | 39.7              |                 |
|                                                                                                                                    | ResponseType[negative]   | 175             | 13.2              | -.02            |
|                                                                                                                                    | DisplayType [monochrome] | 141             | 11.9              | .48             |
| Participant                                                                                                                        | Intercept                | 38316           | 195.7             |                 |
|                                                                                                                                    | ResponseType[negative]   | 136             | 11.7              | .25             |
|                                                                                                                                    | DisplayType [monochrome] | 3631            | 60.3              | .59             |
| Residual                                                                                                                           |                          | 21819           | 147.7             |                 |
| Fixed Effects                                                                                                                      |                          |                 |                   |                 |
| <u>Effect</u>                                                                                                                      |                          | <u>Estimate</u> | <u>Std. Error</u> | <u>t-value</u>  |
| Intercept                                                                                                                          |                          | 298             | 44.2              | 6.75            |
| DisplayType[monochrome]                                                                                                            |                          | -82             | 13.0              | -5.85           |
| ResponseType[negative]                                                                                                             |                          | 11              | 4.6               | 2.38            |
| DisplayType[monochrome]:ResponseType [negative]                                                                                    |                          | -28             | 5.3               | -5.26           |
| <i>Note.</i> Number of observations = 2448                                                                                         |                          |                 |                   |                 |

**Appendix C: Output model Experiment 2**

| <i>Output model Experiment 2 (Linear mixed model fit by maximum likelihood)</i>                                                                                   |                         |                 |                   |                 |
|-------------------------------------------------------------------------------------------------------------------------------------------------------------------|-------------------------|-----------------|-------------------|-----------------|
| Formula<br>RT ~ 1 + ResponseLength * DisplayType * ResponseType<br>+ (1 + ResponseType + DisplayType   Participant) + (1 + ResponseType + DisplayType   Question) |                         |                 |                   |                 |
| Control (lmerControl(optimizer = "bobyqa"))                                                                                                                       |                         |                 |                   |                 |
| <u>AIC</u>                                                                                                                                                        | <u>BIC</u>              | <u>logLik</u>   | <u>deviance</u>   | <u>df.resid</u> |
| 38362                                                                                                                                                             | 38487                   | -19160          | 38320             | 2823            |
| Scaled Residuals                                                                                                                                                  |                         |                 |                   |                 |
| <u>Min</u>                                                                                                                                                        | <u>1Q</u>               | <u>Median</u>   | <u>3Q</u>         | <u>Max</u>      |
| -2.79                                                                                                                                                             | -0.66                   | -0.15           | 0.51              | 4.52            |
| Random Effects                                                                                                                                                    |                         |                 |                   |                 |
| <u>Groups</u>                                                                                                                                                     | <u>Name</u>             | <u>Variance</u> | <u>Std.Dev</u>    | <u>Corr</u>     |
| Question                                                                                                                                                          | Intercept               | 21330           | 146.0             |                 |
|                                                                                                                                                                   | ResponseType[negative]  | 1160            | 34.1              | .29             |
|                                                                                                                                                                   | DisplayType[monochrome] | 1362            | 36.9              | .61             |
| Participant                                                                                                                                                       | Intercept               | 1.839           | 42.9              |                 |
|                                                                                                                                                                   | ResponseType[negative]  | 0.4             | 0.7               | -.29            |
|                                                                                                                                                                   | DisplayType[monochrome] | 2               | 1.3               | .88             |
| Residual                                                                                                                                                          |                         | 37940           | 194.8             |                 |
| Fixed Effects                                                                                                                                                     |                         |                 |                   |                 |
| <u>Effect</u>                                                                                                                                                     |                         | <u>Estimate</u> | <u>Std. Error</u> | <u>t-value</u>  |
| Intercept                                                                                                                                                         |                         | 538             | 25.8              | 20.88           |
| ResponseLength[Long]                                                                                                                                              |                         | 139             | 23.4              | 5.93            |
| DisplayType[monochrome]                                                                                                                                           |                         | -56             | 7.0               | -7.97           |
| ResponseType[negative]                                                                                                                                            |                         | 37              | 6.7               | 5.56            |
| ResponseLength[Long]:DisplayType<br>[monochrome]                                                                                                                  |                         | 25              | 7.0               | 3.59            |
| ResponseLength[Long]:ResponseType<br>[negative]                                                                                                                   |                         | 11              | 6.7               | 1.70            |
| DisplayType[monochrome]:ResponseType<br>[negative]                                                                                                                |                         | -18             | 3.9               | -4.58           |
| ResponseLength[Long]:DisplayType<br>[monochrome]:ResponseType[negative]                                                                                           |                         | -2              | 3.9               | -0.60           |
| <i>Note.</i> Number of observations = 2844                                                                                                                        |                         |                 |                   |                 |

**Appendix D: Comparison of Experiments 1 and 2**

|                                                                                                                                                     |                          |                 |                   |                 |
|-----------------------------------------------------------------------------------------------------------------------------------------------------|--------------------------|-----------------|-------------------|-----------------|
| <i>Output model Experiment 1 vs short responses Experiment 2 (Linear mixed model fit by maximum likelihood)</i>                                     |                          |                 |                   |                 |
| Formula                                                                                                                                             |                          |                 |                   |                 |
| RT ~ 1 + exp * DisplayType * ResponseType<br>+ (1 + ResponseType + DisplayType   Participant:exp) + (1 + ResponseType + DisplayType   Question:exp) |                          |                 |                   |                 |
| Control (lmerControl(optimizer = "bobyqa"))                                                                                                         |                          |                 |                   |                 |
| <u>AIC</u>                                                                                                                                          | <u>BIC</u>               | <u>logLik</u>   | <u>deviance</u>   | <u>df.resid</u> |
| 50320                                                                                                                                               | 50452                    | -25139          | 50278             | 3830            |
| Scaled Residuals                                                                                                                                    |                          |                 |                   |                 |
| <u>Min</u>                                                                                                                                          | <u>1Q</u>                | <u>Median</u>   | <u>3Q</u>         | <u>Max</u>      |
| -3.97                                                                                                                                               | -0.59                    | -0.10           | 0.45              | 5.61            |
| Random Effects                                                                                                                                      |                          |                 |                   |                 |
| <u>Groups</u>                                                                                                                                       | <u>Name</u>              | <u>Variance</u> | <u>Std.Dev</u>    | <u>Corr</u>     |
| Question                                                                                                                                            | Intercept                | 1599            | 40.0              |                 |
|                                                                                                                                                     | ResponseType[negative]   | 134             | 11.6              | -.14            |
|                                                                                                                                                     | DisplayType [monochrome] | 99              | 9.9               | .45             |
| Participant                                                                                                                                         | Intercept                | 28068           | 167.5             |                 |
|                                                                                                                                                     | ResponseType[negative]   | 209             | 14.5              | .07             |
|                                                                                                                                                     | DisplayType [monochrome] | 3100            | 55.7              | .62             |
| Residual                                                                                                                                            |                          | 24527           | 156.6             |                 |
| Fixed Effects                                                                                                                                       |                          |                 |                   |                 |
| <u>Effect</u>                                                                                                                                       |                          | <u>Estimate</u> | <u>Std. Error</u> | <u>t-value</u>  |
| Intercept                                                                                                                                           |                          | 348             | 27.2              | 12.79           |
| exp[1]                                                                                                                                              |                          | -50             | 27.2              | -1.84           |
| DisplayType[monochrome]                                                                                                                             |                          | -81             | 9.3               | -8.70           |
| ResponseType[negative]                                                                                                                              |                          | 19              | 4.0               | 4.67            |
| exp[1]:DisplayType[monochrome]                                                                                                                      |                          | 0               | 9.4               | -0.03           |
| exp[1]:ResponseType[negative]                                                                                                                       |                          | -8              | 4.0               | -1.90           |
| DisplayType[monochrome]:ResponseType [negative]                                                                                                     |                          | -22             | 3.5               | -6.16           |
| exp[1]:DisplayType[monochrome]: ResponseType[negative]                                                                                              |                          | -6              | 3.5               | -1.76           |
| <i>Note.</i> Number of observations = 3851                                                                                                          |                          |                 |                   |                 |

## ANSWERING POLAR QUESTIONS

The null effect for the interactions between Experiments and DisplayType and between Experiments and Response Type suggests that the manipulation effects were comparable across experiments. This conclusion is supported by an additional Bayesian analysis with very weakly informative priors ( $N(0,500)$  for all fixed effects, i.e. assuming that 95% of effects will lie in the range -1000ms to +1000ms) using Stan and the R package brms (Bürkner, 2017). This analysis, with Bayes Factors all above 20 for the lack of an interaction, is more directly suggestive of there being no interaction between Experiment and any manipulation. For the potential main effect of Experiment (est=-50ms,  $t=-1.84$  in the combined frequentist model; Bayesian credible interval [-108.70, 6.73]), the statistical interpretation is clear: Participants in Experiment 1 may have been faster overall than in Experiment 2, but the evidence for this statement is mixed..

| <i>Bayesian hypothesis testing of null-hypothesis for interaction terms with Experiment</i> |             |             |                     |                          |                                                           |
|---------------------------------------------------------------------------------------------|-------------|-------------|---------------------|--------------------------|-----------------------------------------------------------|
| <b>Interaction Term</b>                                                                     | <b>Est.</b> | <b>Err.</b> | <b>CI<br/>1-95%</b> | <b>CI<br/>u-<br/>95%</b> | <b>Bayes<br/>Factor for<br/>Point Null<br/>Hypothesis</b> |
| exp1:Conditionmonochrome                                                                    | -0.21       | 9.80        | -19.68              | 18.74                    | 54.45                                                     |
| exp1:TargetAnswernegative                                                                   | -7.59       | 4.08        | -15.67              | 0.48                     | 23.61                                                     |
| exp1:Conditionmonochrome:TargetAnswernegative                                               | -6.34       | 3.58        | -13.25              | 0.75                     | 31.47                                                     |

Reference:

Bürkner, Paul-Christian (2017). brms: An R Package for Bayesian Multilevel Models Using Stan. *Journal of Statistical Software*, 80(1), 1-28. doi:10.18637/jss.v080.i01
